# Supplementary material for: Development and validation of a 21-item challenges to stopping smoking (CSS-21) scale
Source: PubMed Central journal article supplement — BMJ Open. 2016 Mar 31;6(3):e011265. doi: 10.1136/bmjopen-2016-011265 (PMC4823391; doi:10.1136/bmjopen-2016-011265), 2016-03-31

**Supplementary table 1: Items derived from the BCS scale**

| <b>BCS Scale</b>                                                                                   | <b>CSS-21 Scale</b>                                                                                                                    |
|----------------------------------------------------------------------------------------------------|----------------------------------------------------------------------------------------------------------------------------------------|
| <b>Addiction barriers</b>                                                                          |                                                                                                                                        |
| 1. Withdrawal symptoms                                                                             | Rephrased and retained                                                                                                                 |
| 2. Miss the companionship of cigarettes                                                            | During initial testing, it was found that this item is measuring the same concept as item 8, and hence removed from the CSS-21 scale   |
| 3. Thinking about never being able to smoke again                                                  | Rephrased and retained                                                                                                                 |
| 4. Thinking about cigarettes all the time                                                          | During initial testing, it was found that this item is measuring the same concept as item 8, and hence removed from the CSS-21 scale   |
| 5. Not knowing for how long it will be very hard not to smoke                                      | During initial testing, this item was found to be redundant and/or difficult to understand, and hence removed from the CSS-21 scale    |
| 6. Being addicted to the cigarettes                                                                | Retained                                                                                                                               |
| 7. Fear of failing to quit                                                                         | Rephrased and retained                                                                                                                 |
| 8. Feeling lost without cigarettes                                                                 | Retained                                                                                                                               |
| <b>External Barriers</b>                                                                           |                                                                                                                                        |
| 9. No encouragement or help from friends                                                           | During initial testing, it was found that this item is measuring the same concept as item 11, and hence removed from the CSS-21 scale. |
| 10. Family members or significant others encouraging you to smoke                                  | Rephrased and retained                                                                                                                 |
| 11. No encouragement or help from family members or significant others                             | Rephrased and retained                                                                                                                 |
| 12. Friends encouraging you to smoke                                                               | During initial testing, it was found that this item is measuring the same concept as item 10, and hence removed from the CSS-21 scale. |
| 13. No encouragement at work for not smoking                                                       | Rephrased and retained                                                                                                                 |
| 14. Lack of understanding from family and significant others about what it is like to quit smoking | During initial testing, this item was found to be redundant and/or difficult to understand, and hence removed from the CSS-21 scale.   |
| 15. Seeing things or people which remind you of smoking                                            | Rephrased and retained                                                                                                                 |
| <b>Internal Barriers</b>                                                                           |                                                                                                                                        |

|                                                                                           |                                                                                                                                        |
|-------------------------------------------------------------------------------------------|----------------------------------------------------------------------------------------------------------------------------------------|
|                                                                                           |                                                                                                                                        |
| 16. Having strong feelings such as anger or feeling upset when you are by yourself        | Rephrased and retained                                                                                                                 |
| 17. Feeling less in your control of your moods                                            | During initial testing, it was found that this item is measuring the same concept as item 16, and hence removed from the CSS-21 scale. |
| 18. Having strong feelings such as anger, or feeling upset when you are with other people | Rephrased and combined with item 16                                                                                                    |
| <b>Item not loaded in any subscale</b>                                                    |                                                                                                                                        |
| 19. Fear of weight gain                                                                   | This item was not loaded on any subscales in the BCS scale, but was included in CSS-21 scale.                                          |

Supplementary figure 1: Screeplot of eigenvalues

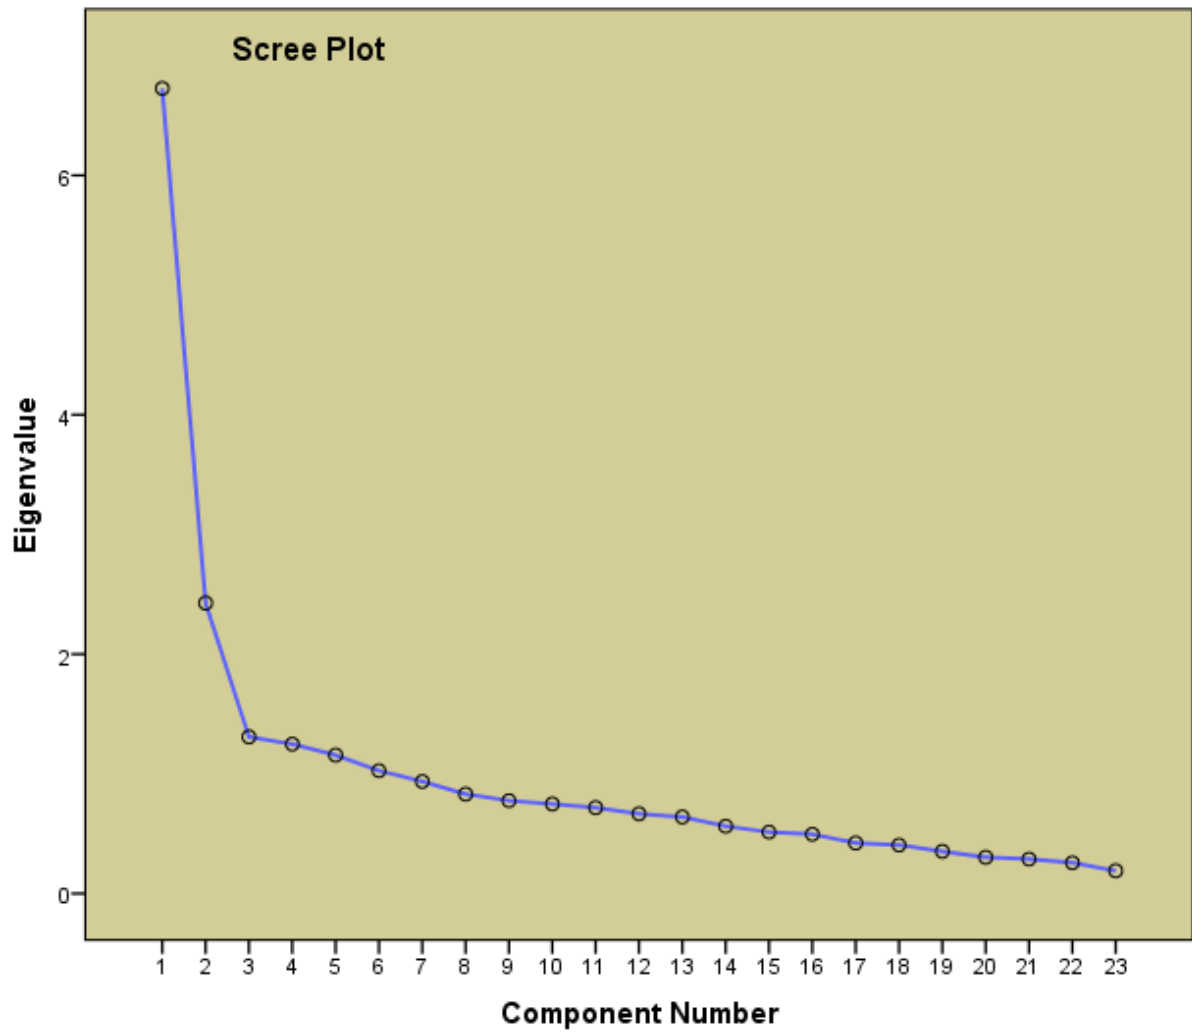

Supplement: bmjopen-2016-011265supp.pdf [file bmjopen-2016-011265supp.pdf]
